# Supplementary material
Source: PubMed Central journal article supplement (PMC4030679)

# Supporting Information

## Absolute Configurations of Spiroiminodihydantoin and Allantoin Stereoisomers: Comparison of Computed and Measured Electronic Circular Dichroism Spectra

*Shuang Ding,<sup>†</sup> Lei Jia,<sup>†</sup> Alexander Durandin,<sup>‡</sup> Conor Crean,<sup>‡</sup> Alexander Kolbanovskiy,<sup>‡</sup>  
Vladimir Shafirovich,<sup>‡</sup> Suse Broyde,<sup>†</sup> and Nicholas E. Geacintov<sup>\*,‡</sup>*

<sup>†</sup>Department of Biology and <sup>‡</sup>Department of Chemistry, New York University, New  
York, NY 10003

# CD spectra of Spiro adducts in acetonitrile

Adduct concentrations: 1,0 OD unit at 230nm ( $9.52 \times 10^{-5}$  g/mL)

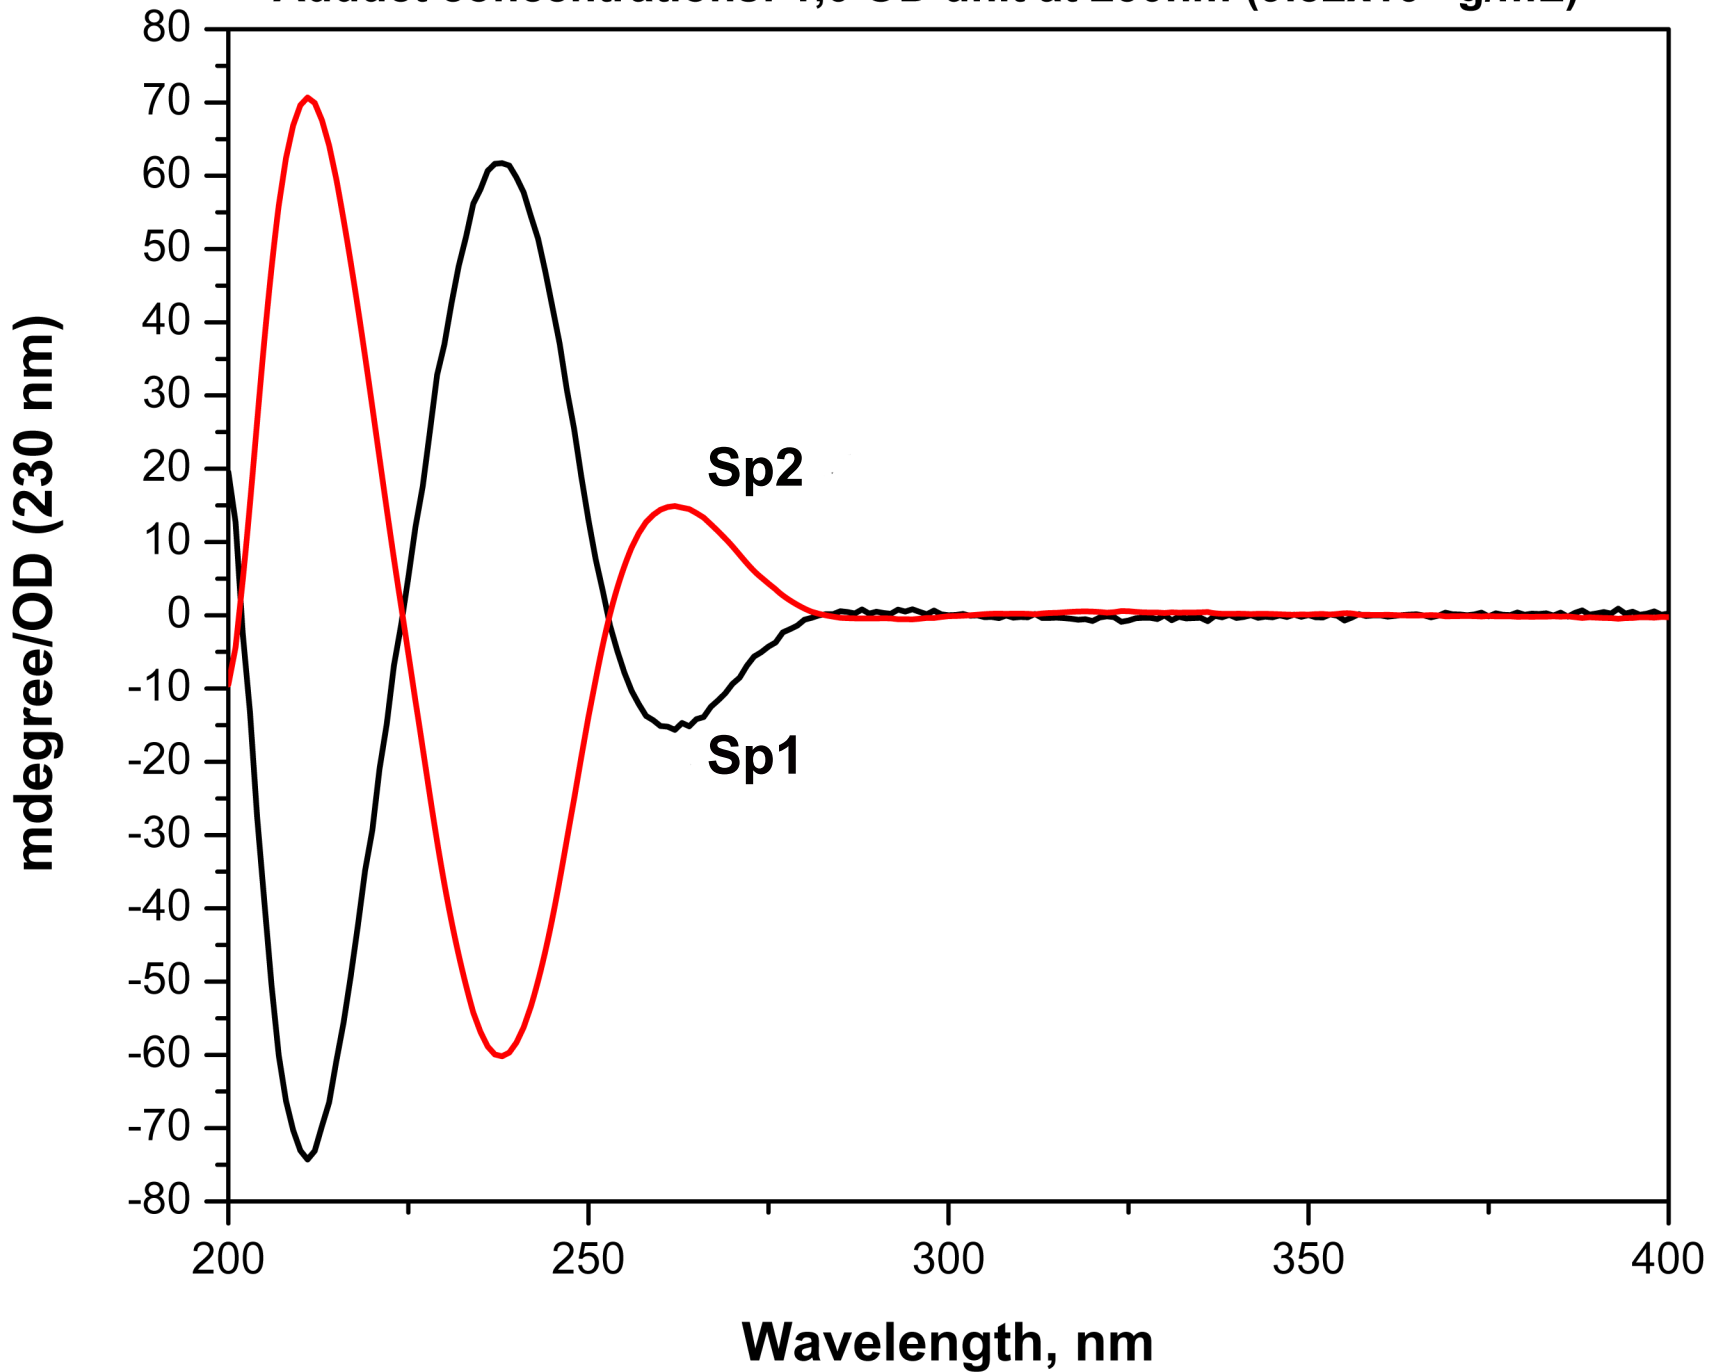

# ORD spectrum of Sp1 in acetonitrile

Sp1 concentration:  $1.17 \times 10^{-3}$  g/mL

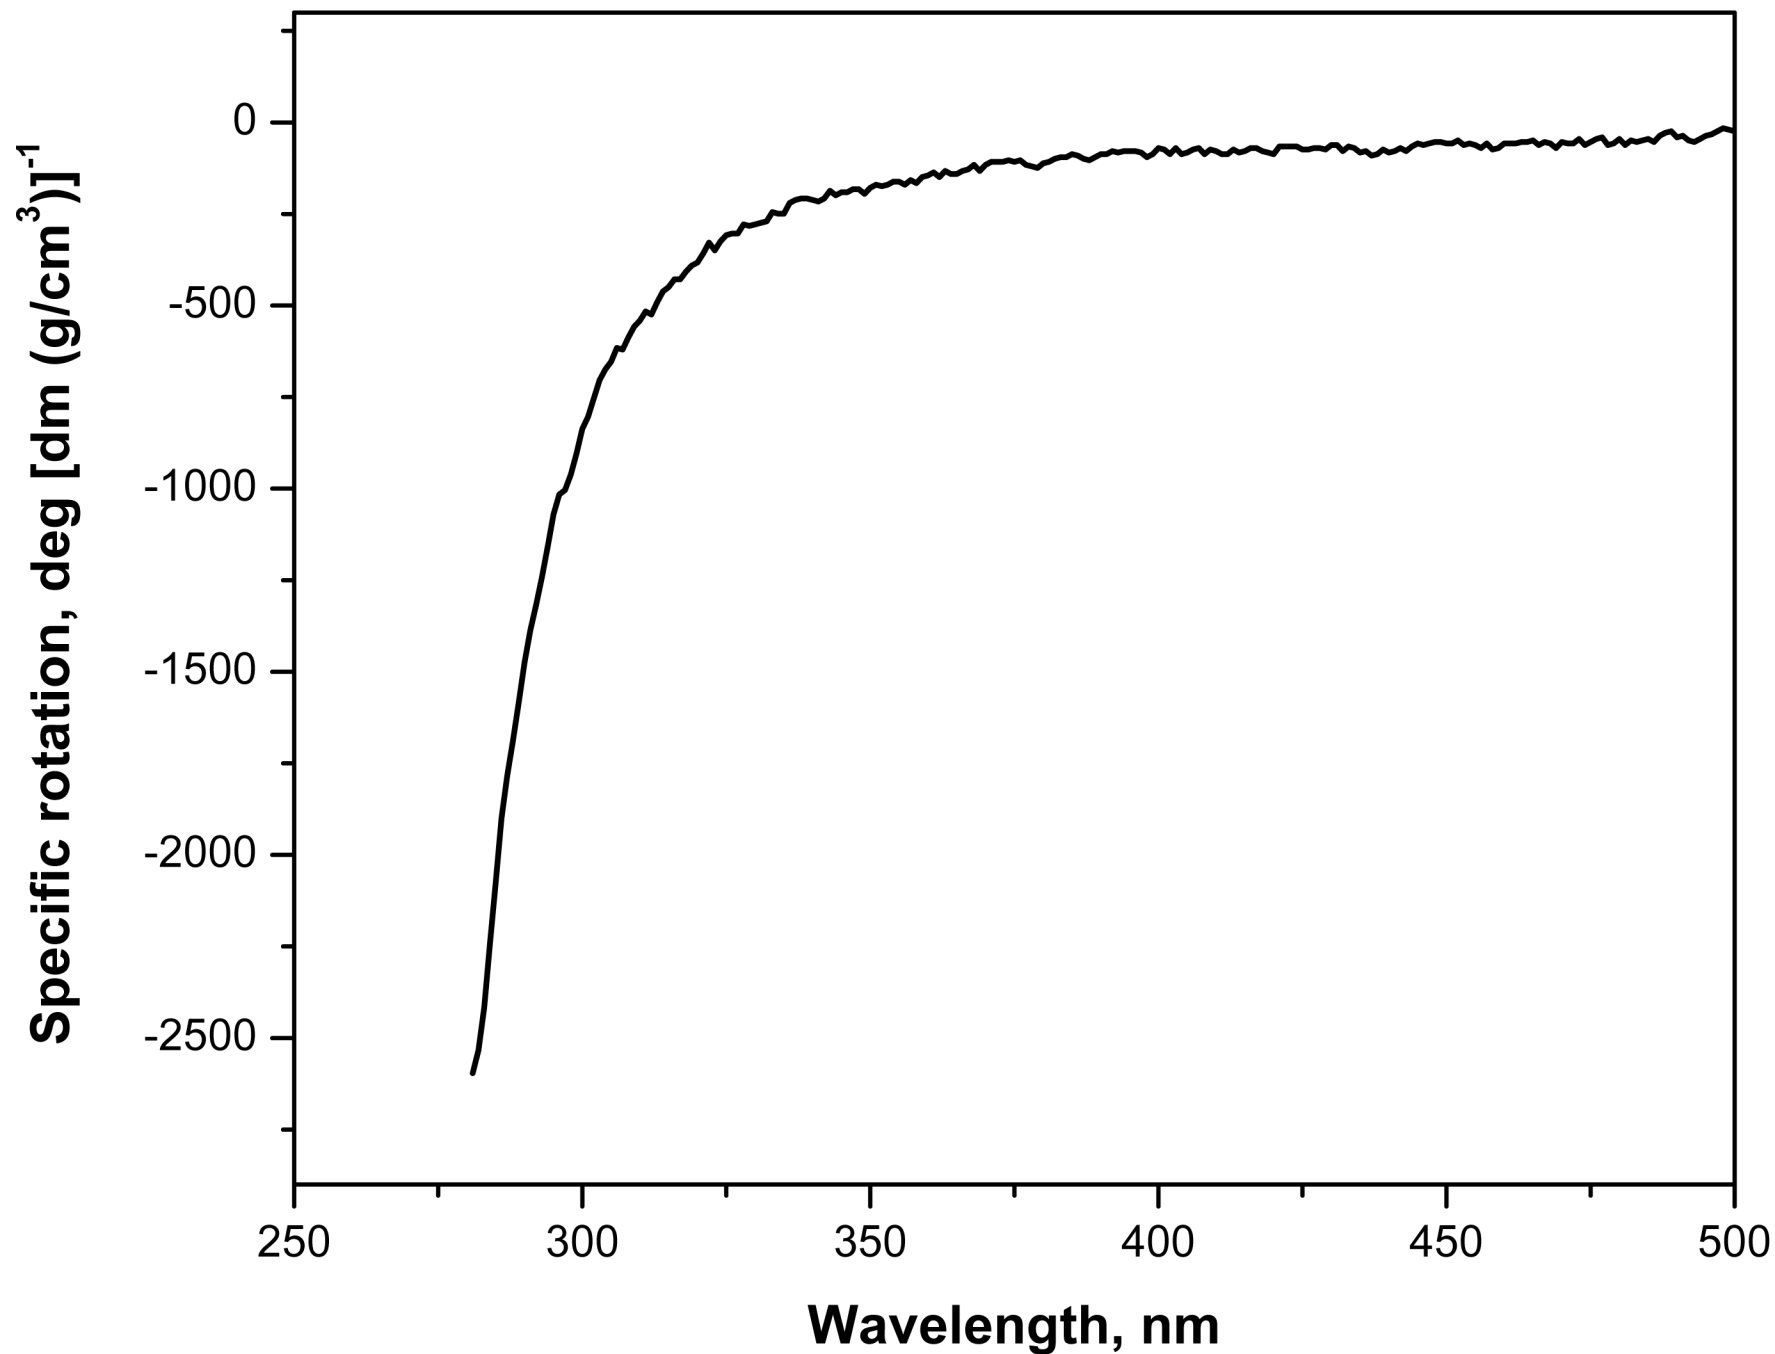

Supplement: NIHMS582619-supplement-01.pdf [file NIHMS582619-supplement-01.pdf]
